# Supplementary material for: ‘There’s something about admitting that you are lonely’ – prevalence, impact and solutions to loneliness in terminal illness: An explanatory sequential multi-methods study
Source: PubMed Central journal article supplement (PMC9749015; doi:10.1177/02692163221122269), 2022-09-08
Supplement: sj-pdf-1-pmj-10.1177_02692163221122269.pdf [file sj-pdf-1-pmj-10.1177_02692163221122269.pdf]

## Supplementary file 1: Survey questions

### Loneliness among people who are terminally ill and their informal carers in Northern Ireland: Perspectives and experiences of health and social care professionals

By completing this survey, you are consenting to participate in this study.

| Question                                                                                                                                                                                                                                                                                                                                                                                                                                                                             | Options                                                                                                                                                                 |
|--------------------------------------------------------------------------------------------------------------------------------------------------------------------------------------------------------------------------------------------------------------------------------------------------------------------------------------------------------------------------------------------------------------------------------------------------------------------------------------|-------------------------------------------------------------------------------------------------------------------------------------------------------------------------|
| <b>About you</b>                                                                                                                                                                                                                                                                                                                                                                                                                                                                     |                                                                                                                                                                         |
| 1. Gender                                                                                                                                                                                                                                                                                                                                                                                                                                                                            | Female<br>Male<br>Other [open text]<br>Prefer not to say                                                                                                                |
| 2. Ethnicity                                                                                                                                                                                                                                                                                                                                                                                                                                                                         | White<br>Mixed or Multiple ethnic groups<br>Asian or Asian British<br>Black, African, Caribbean or Black British<br>Other ethnic group                                  |
| 3. Age group                                                                                                                                                                                                                                                                                                                                                                                                                                                                         | 18-30<br>31-40<br>41-50<br>51-60<br>61+<br>Prefer not to say                                                                                                            |
| 4. What is your job role in Marie Curie?                                                                                                                                                                                                                                                                                                                                                                                                                                             | Registered Nurse<br>Healthcare Assistant<br>Patient and family support team<br>Rehab Team                                                                               |
| 5. Number of years' experience providing palliative care in current or previous role                                                                                                                                                                                                                                                                                                                                                                                                 | [Open text]<br>Prefer not to say                                                                                                                                        |
| <b>Prevalence of loneliness among Marie Curie patients and their informal carers</b>                                                                                                                                                                                                                                                                                                                                                                                                 |                                                                                                                                                                         |
| <p><i>This study adopts the official definition of loneliness used by the UK Government, i.e.: Loneliness is a subjective, unwelcome feeling of lack or loss of companionship, which happens when there is a mismatch between the quantity and quality of social relationships that we have, and those that we want.</i></p> <p><i>An informal carer is anyone providing unpaid care or support. This could be a spouse, parent, child, other relative, neighbour or friend.</i></p> |                                                                                                                                                                         |
| 6. To what extent has the COVID-19 pandemic impacted on the prevalence of loneliness among the patients you care for?                                                                                                                                                                                                                                                                                                                                                                | No increase in numbers experiencing loneliness<br>Slight increase in numbers experiencing loneliness<br>Moderate increase in numbers<br>Substantial increase in numbers |
| 7. In your opinion/from your perspective, to what extent has                                                                                                                                                                                                                                                                                                                                                                                                                         | No increase in numbers<br>Slight increase in numbers                                                                                                                    |

|                                                                                                                                                                                |                                                                                                                                                                                                                                                                      |
|--------------------------------------------------------------------------------------------------------------------------------------------------------------------------------|----------------------------------------------------------------------------------------------------------------------------------------------------------------------------------------------------------------------------------------------------------------------|
| the COVID-19 pandemic impacted on the prevalence of loneliness among their informal carers?                                                                                    | Moderate increase in numbers<br>Substantial increase in numbers                                                                                                                                                                                                      |
| <i>While the previous two questions [6 and 7] have focused on loneliness during the pandemic, the following questions focus on loneliness in general (outside of COVID-19)</i> |                                                                                                                                                                                                                                                                      |
| 8. In your typical pre-pandemic caseload, have you provided care or support for <u>patients</u> who you believe may have been experiencing loneliness?                         | Yes<br>No [skips to Q11]<br>Don't know [skips to Q11]                                                                                                                                                                                                                |
| 9. What caused you to come to this conclusion? Select as many as appropriate.                                                                                                  | The patient told me/indicated that they were experiencing loneliness<br>Informal carer told me/indicated that the patient was experiencing loneliness<br>My own observations about the patients' circumstances<br>Other [open text]                                  |
| 10. In your typical pre-pandemic caseload, what proportion of the patients you cared for or supported do you believe may have been experiencing loneliness?                    | 0-25%<br>26-50%<br>51-75%<br>76-100%<br>Don't know                                                                                                                                                                                                                   |
| 11. In your typical pre-pandemic caseload, have you supported <u>an informal carer</u> who you believe may have been experiencing loneliness?                                  | Yes<br>No [if also selected 'no' to Q8, skips to end of survey; if selected 'yes' to Q8, skips to Q14]<br>Don't know [if also selected 'no' to Q8, skips to Q16; if selected 'yes' to Q8, skips to Q14]                                                              |
| 12. What caused you to come to this conclusion? Select as many as appropriate                                                                                                  | An informal carer told me/indicated that they were experiencing loneliness<br>A patient or informal carer told me/indicated that the informal carer was experiencing loneliness<br>My own observations about the informal carer's circumstances<br>Other [open text] |
| 13. In your typical pre-pandemic caseload, what proportion of informal carers do you believe may have been experiencing loneliness?                                            | 0-25%<br>26-50%<br>51-75%<br>76-100%<br>Don't know                                                                                                                                                                                                                   |
| <b>Impact of loneliness on Marie Curie patients and their informal carers</b>                                                                                                  |                                                                                                                                                                                                                                                                      |
| 14. How would you rate the impact of loneliness on the end of life care experiences of the patients you cared for or supported?                                                | <ul style="list-style-type: none"> <li>▪ <b>Psychological wellbeing</b> <ul style="list-style-type: none"> <li>➤ Low</li> <li>➤ Medium</li> <li>➤ High</li> </ul> </li> <li>▪ <b>Spiritual wellbeing</b></li> </ul>                                                  |

|                                                                                                                                                                                   |                                                                                                                                                                                                                                                                                                                                                                                                                                                                           |
|-----------------------------------------------------------------------------------------------------------------------------------------------------------------------------------|---------------------------------------------------------------------------------------------------------------------------------------------------------------------------------------------------------------------------------------------------------------------------------------------------------------------------------------------------------------------------------------------------------------------------------------------------------------------------|
|                                                                                                                                                                                   | <ul style="list-style-type: none"> <li>➤ Low</li> <li>➤ Medium</li> <li>➤ High</li> <li>▪ <b>Physical wellbeing</b></li> <li>➤ Low</li> <li>➤ Medium</li> <li>➤ High</li> <li>▪ <b>Social wellbeing</b></li> <li>➤ Low</li> <li>➤ Medium</li> <li>➤ High</li> </ul> <p>[open text to provide further information, but not mandatory]</p>                                                                                                                                  |
| 15. How would you rate the impact of loneliness on the end of life care experiences of the informal carers you supported?                                                         | <ul style="list-style-type: none"> <li>▪ <b>Psychological wellbeing</b></li> <li>➤ Low</li> <li>➤ Medium</li> <li>➤ High</li> <li>▪ <b>Spiritual wellbeing</b></li> <li>➤ Low</li> <li>➤ Medium</li> <li>➤ High</li> <li>▪ <b>Physical wellbeing</b></li> <li>➤ Low</li> <li>➤ Medium</li> <li>➤ High</li> <li>▪ <b>Social wellbeing</b></li> <li>➤ Low</li> <li>➤ Medium</li> <li>➤ High</li> </ul> <p>[open text to provide further information, but not mandatory]</p> |
| <b>Possible solutions for reducing loneliness among Marie Curie patients and their informal carers</b>                                                                            |                                                                                                                                                                                                                                                                                                                                                                                                                                                                           |
| 16. Is there anything you do in your current practice to address loneliness among a) your patients and; b) their informal carers?                                                 | [open text]                                                                                                                                                                                                                                                                                                                                                                                                                                                               |
| 17. In your opinion, what are the barriers to reducing loneliness among a) terminally ill patients and; b) their informal carers?                                                 | [open text]                                                                                                                                                                                                                                                                                                                                                                                                                                                               |
| 18. Is there anything else you would like to tell us about loneliness among terminally ill patients and their informal carers, and how it impacts their care towards end of life? | [open text]                                                                                                                                                                                                                                                                                                                                                                                                                                                               |
